# Supplementary material
Source: MDPI journal article supplement (https://www.mdpi.com/2624-862X/5/2/23)

**Figure S1. Chlorate occurrence in milk from each participating processor in 2020.**

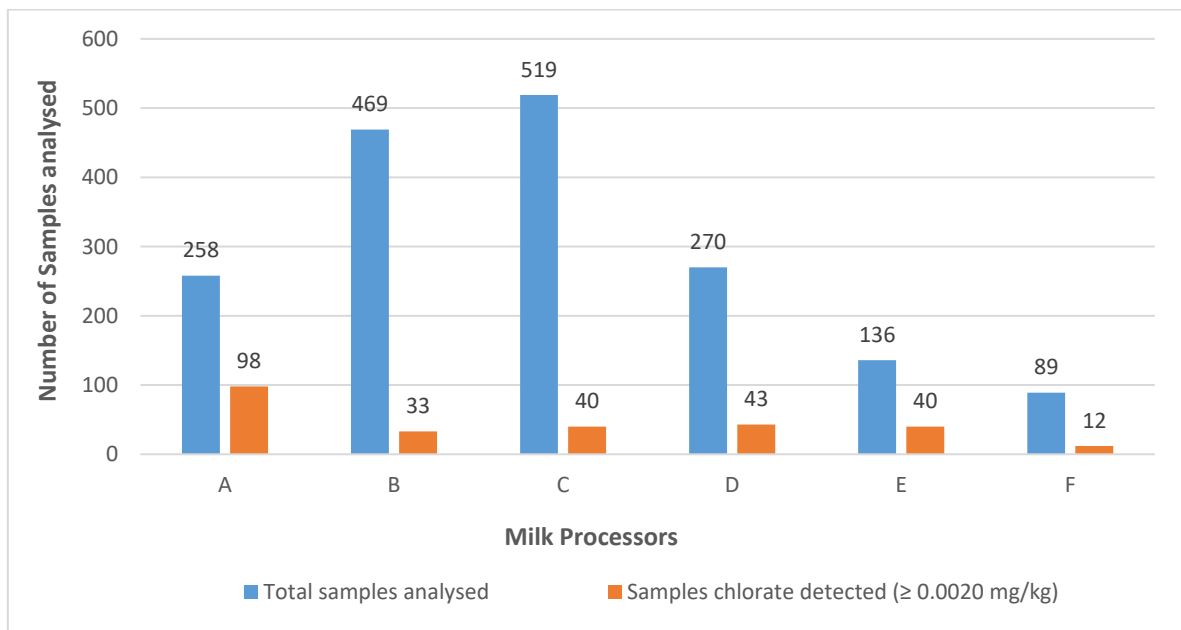

**Figure S2. Chlorate occurrence in milk from each participating processor in 2021.**

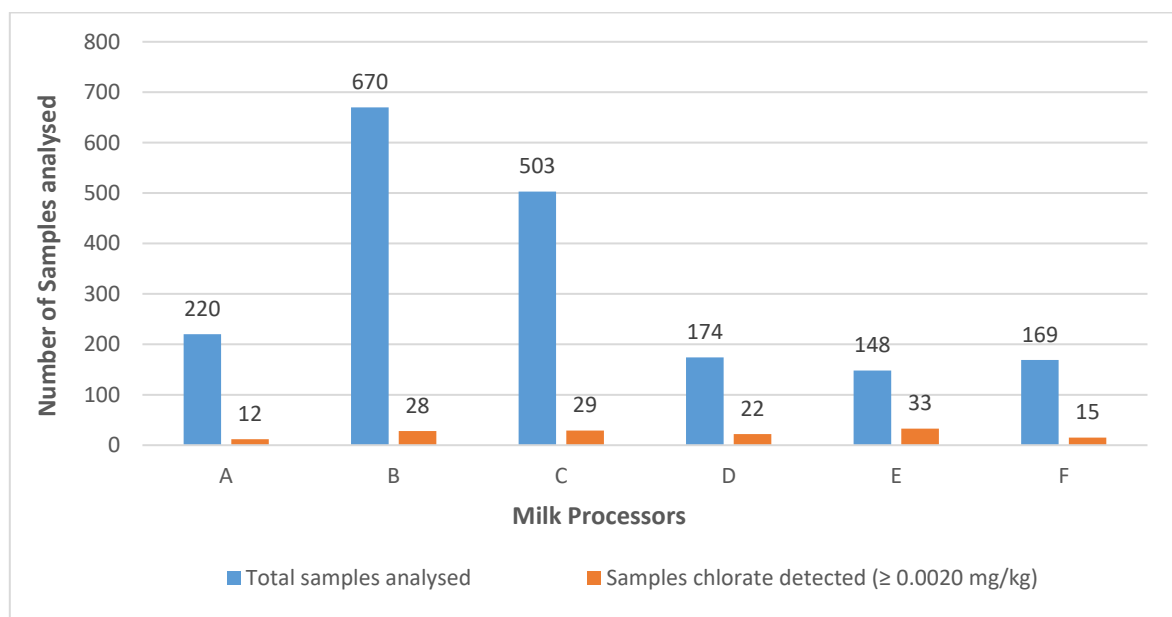

**Figure S3. Trichloromethane (TCM) occurrence in milk from each participating processor in 2020.**

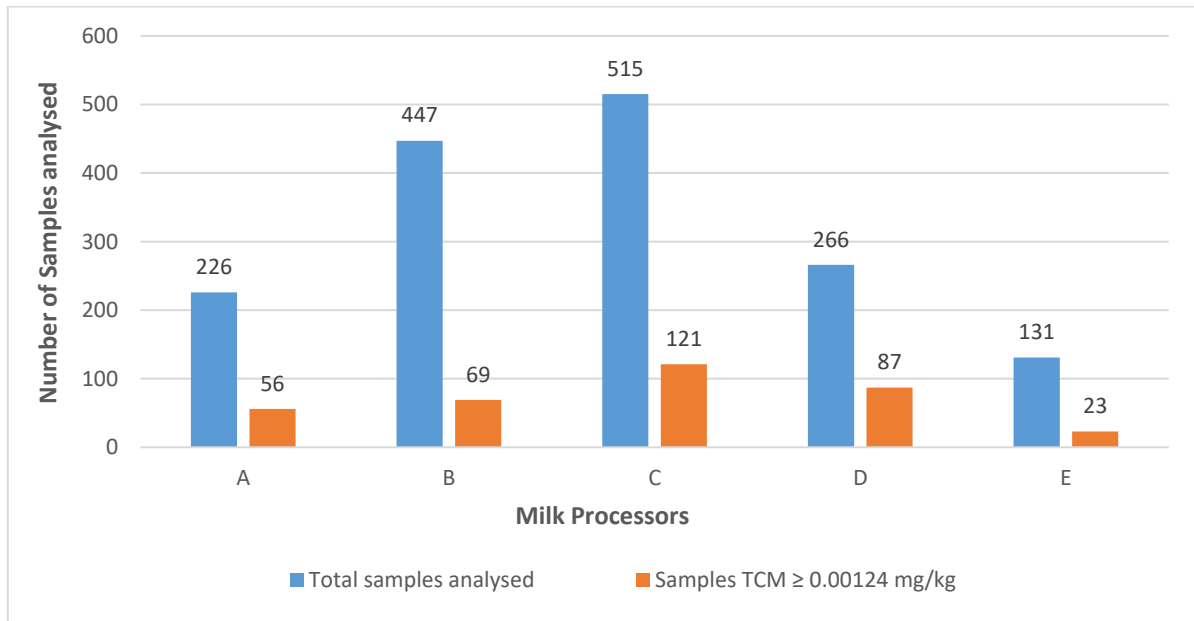

**Figure S4. Trichloromethane (TCM) occurrence in milk from each participating processor in 2021.**

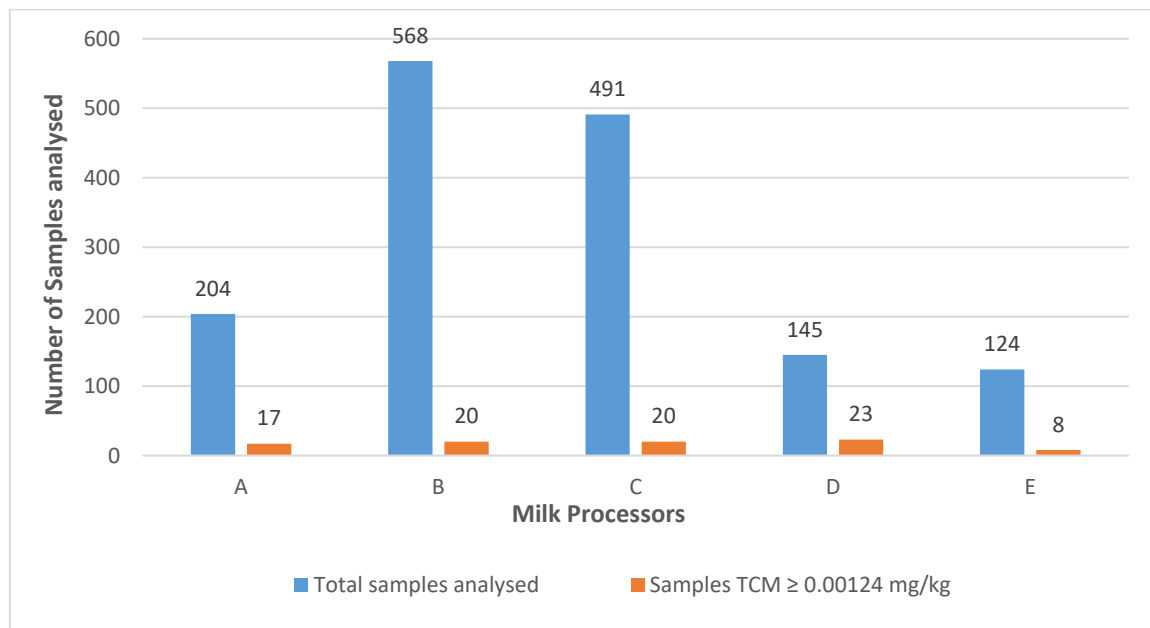

Supplement: s1 [file s1]
